# Supplementary material for: Development of a regional probabilistic seismic hazard model for Central Asia
Source: Copernicus journal article supplement (doi:10.5194/nhess-25-817-2025), 2025-02-21
Supplement: Supplementary file 1 [file nhess-25-817-2025-supplement.pdf]

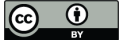

*Supplement of*

## **Development of a regional probabilistic seismic hazard model for Central Asia**

**Valerio Poggi et al.**

*Correspondence to:* Valerio Poggi (vpoggi@ogs.it)

The copyright of individual parts of the supplement might differ from the article licence.

## S1. Seismicity analysis parameters

**Table S1.** Completeness matrix for each source group of the homogenous area source model.

| Source Group | Magnitude | Bin width | Starting year | Ending year |
|--------------|-----------|-----------|---------------|-------------|
| <b>A</b>     | 4.25      | 0.25      | 1990          | 2020        |
|              | 4.50      | 0.25      | 1965          | 2020        |
|              | 4.75      | 0.25      | 1965          | 2020        |
|              | 5.00      | 0.50      | 1950          | 2020        |
|              | 5.50      | 0.50      | 1920          | 2020        |
|              | 6.00      | 0.50      | 1900          | 2020        |
|              | 6.50      | 1.00      | 1850          | 2020        |
|              | 7.50      | 1.00      | 1800          | 2020        |
|              | <b>B</b>  | 4.25      | 0.25          | 1980        |
| 4.50         |           | 0.25      | 1965          | 2020        |
| 4.75         |           | 0.25      | 1965          | 2020        |
| 5.00         |           | 0.50      | 1950          | 2020        |
| 5.50         |           | 0.50      | 1905          | 2020        |
| 6.00         |           | 0.50      | 1900          | 2020        |
| 6.50         |           | 1.00      | 1850          | 2020        |
| 4.50         |           | 0.25      | 1960          | 2020        |
| 4.75         |           | 0.25      | 1960          | 2020        |
| <b>C</b>     | 5.00      | 0.50      | 1950          | 2020        |
|              | 5.50      | 0.50      | 1920          | 2020        |
|              | 6.00      | 0.50      | 1900          | 2020        |
|              | 6.50      | 0.50      | 1900          | 2020        |
|              | 7.00      | 1.00      | 1900          | 2020        |
|              | 4.50      | 0.25      | 1960          | 2020        |
|              | 4.75      | 0.25      | 1960          | 2020        |
| <b>D</b>     | 5.00      | 0.50      | 1950          | 2020        |
|              | 5.50      | 0.50      | 1920          | 2020        |
|              | 6.00      | 1.00      | 1850          | 2020        |
|              | 7.00      | 1.00      | 1800          | 2020        |
|              | 4.00      | 0.50      | 2000          | 2020        |
| <b>E</b>     | 4.50      | 0.50      | 1960          | 2020        |
|              | 4.00      | 0.50      | 1990          | 2020        |
|              | 4.50      | 0.50      | 1970          | 2020        |
| <b>F</b>     | 5.00      | 0.50      | 1950          | 2020        |
|              | 5.50      | 0.50      | 1920          | 2020        |
|              | 6.00      | 0.50      | 1900          | 2020        |
| <b>G</b>     | 4.50      | 0.25      | 1980          | 2020        |

---

|          |      |      |      |      |
|----------|------|------|------|------|
|          | 4.75 | 0.25 | 1960 | 2020 |
|          | 5.00 | 0.50 | 1930 | 2020 |
|          | 5.50 | 0.50 | 1910 | 2020 |
|          | 6.00 | 1.00 | 1900 | 2020 |
|          | 7.00 | 1.00 | 1850 | 2020 |
|          | 4.25 | 0.25 | 1990 | 2020 |
|          | 4.50 | 0.25 | 1965 | 2020 |
|          | 4.75 | 0.25 | 1965 | 2020 |
| <b>H</b> | 5.00 | 0.50 | 1950 | 2020 |
|          | 5.50 | 0.50 | 1920 | 2020 |
|          | 6.00 | 1.00 | 1900 | 2020 |
|          | 7.00 | 1.00 | 1850 | 2020 |
|          | 4.25 | 0.25 | 1990 | 2020 |
|          | 4.50 | 0.25 | 1965 | 2020 |
| <b>K</b> | 4.75 | 0.25 | 1965 | 2020 |
|          | 5.00 | 0.50 | 1950 | 2020 |
|          | 5.50 | 1.50 | 1900 | 2020 |
|          | 4.00 | 0.50 | 2000 | 2020 |
|          | 4.50 | 0.50 | 1980 | 2020 |
| <b>L</b> | 5.00 | 0.50 | 1950 | 2020 |
|          | 5.50 | 1.00 | 1920 | 2020 |
|          | 6.50 | 1.00 | 1900 | 2020 |
|          | 7.50 | 1.00 | 1800 | 2020 |

---

## S2. PSHA maps of Central Asia for different return periods

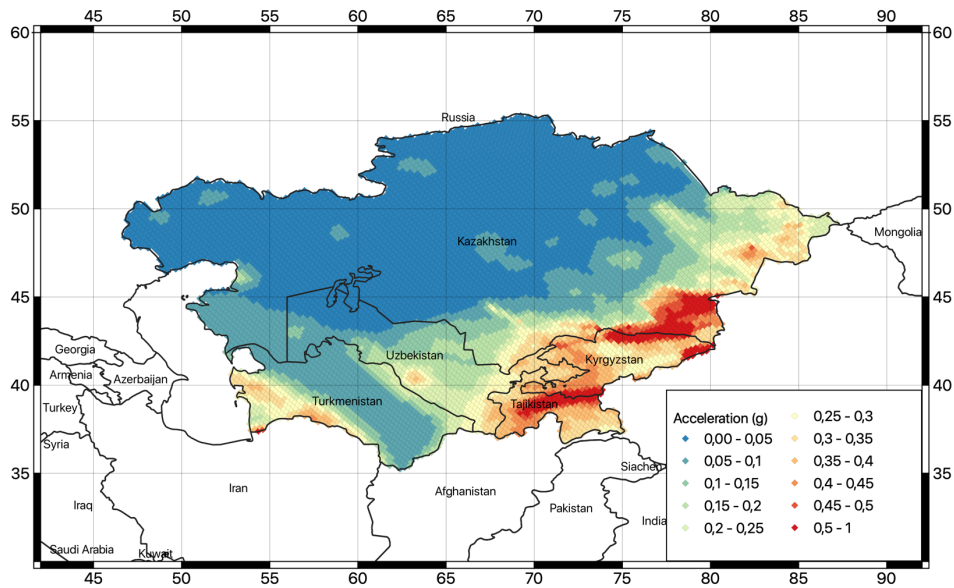

**Figure S1.** Map of the computed peak ground accelerations (PGA) with 5% probability of exceedance for 50 years investigation time (corresponding to about 1000 years return period) on rock conditions ( $V_{s30}$  of 800m/s).

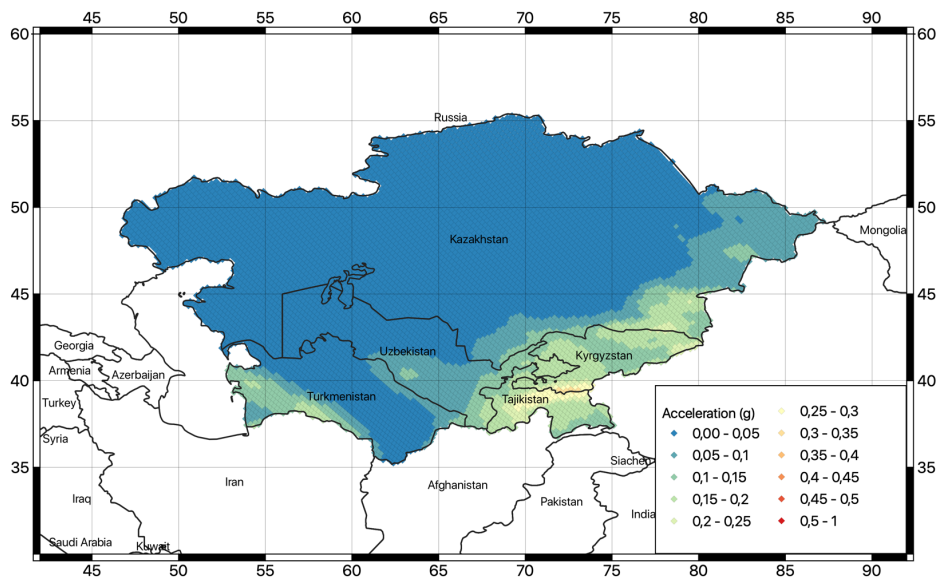

**Figure S2.** Map of the computed peak ground accelerations (PGA) with 39% probability of exceedance for 50 years investigation time (corresponding to about 100 years return period) on rock conditions ( $V_{s30}$  of 800m/s).

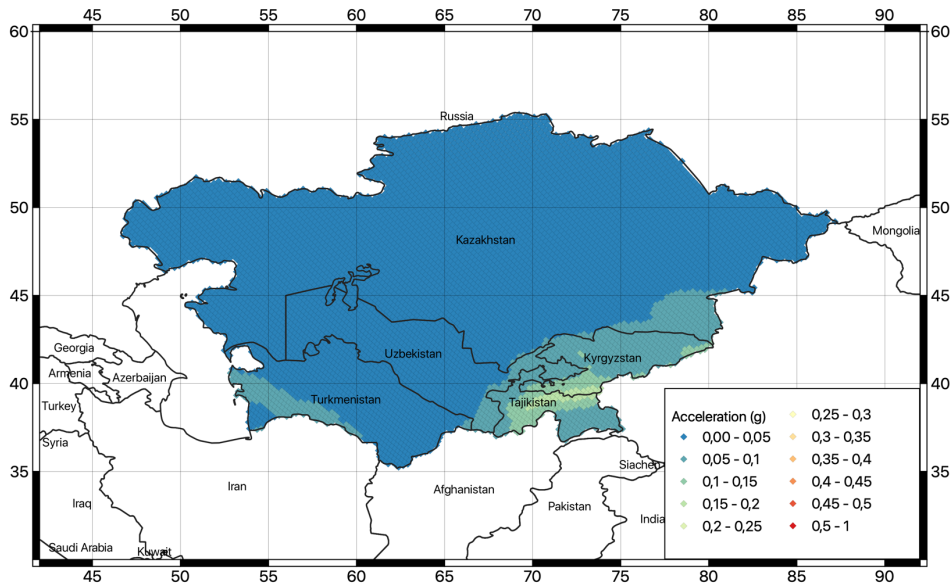

**Figure S3.** Map of the computed peak ground accelerations (PGA) with 89% probability of exceedance for 50 years investigation time (corresponding to about 25 years return period).

### S3. Previous PSHA studies for Central Asia

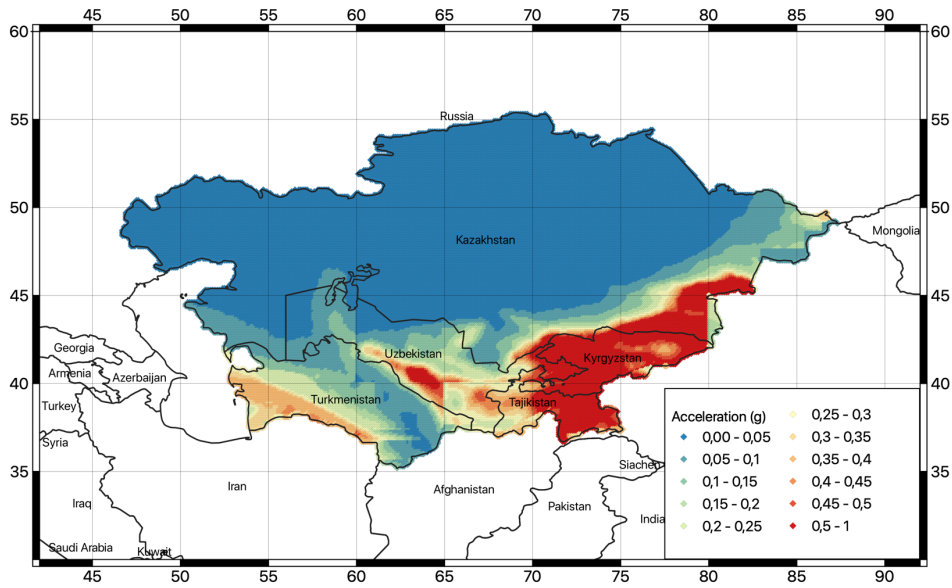

**Figure S4.** Map of the computed peak ground accelerations (PGA) with 10% probability of exceedance for 50 years investigation time from the Global Seismic Hazard Assessment Program (GSHAP, Giardini et al. 1999).

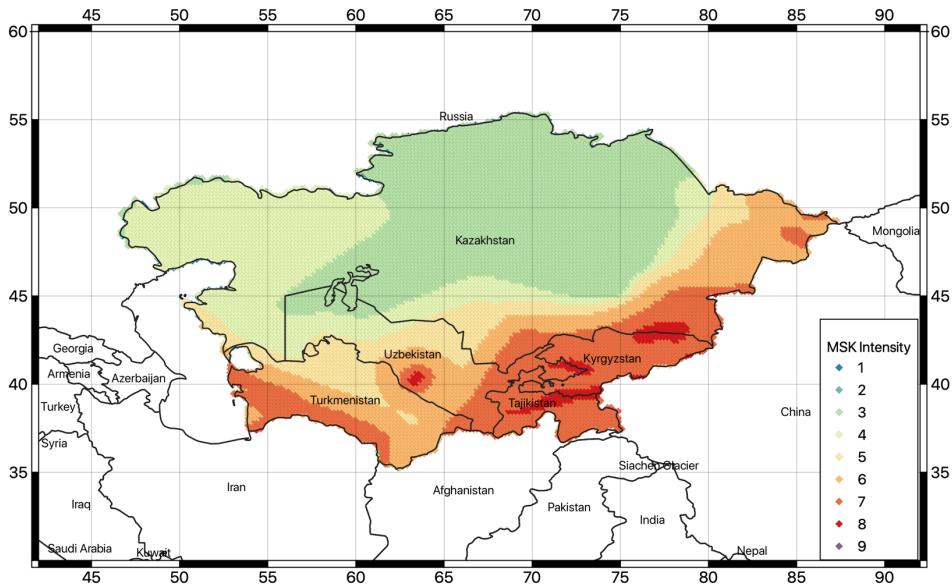

**Figure S5.** Map of the macroseismic intensity (MSK) with 10% probability of exceedance for 50 years investigation time computed by Ullah et al. (2015) within the EMCA project.
